# Supplementary material for: Synergistic Effects of Doxorubicin and Quercetin on ROS-Associated Apoptosis and EGFR/FOXP3 Modulation in OVCAR3 Cells
Source: MDPI journal article supplement (doi:10.3390/biomedicines14061248), 2026-05-30
Supplement: s1 [file Supplementary Table S1.pdf › Supplementary Table S1.pdf]

**Table S1.** Summary of Flow Cytometry ROS Analysis Parameters in OVCAR3 Cells

| Category                                | Parameter / Comparison   | Value / Observation                                        | Interpretation / Purpose           |
|-----------------------------------------|--------------------------|------------------------------------------------------------|------------------------------------|
| <b>Raw Fluorescence Intensity (MFI)</b> | Unstained Control        | 120                                                        | Autofluorescence baseline          |
|                                         | Control                  | 250 (1.00-fold)                                            | Basal ROS level                    |
|                                         | Q                        | 545 (2.18-fold)                                            | Moderate ROS increase              |
|                                         | DOX                      | 860 (3.45-fold)                                            | Significant ROS induction          |
|                                         | DOX+Q                    | 1705 (6.82-fold)                                           | Strong synergistic ROS increase    |
|                                         | NAC + DOX+Q              | 380 (1.52-fold)                                            | ROS suppression/rescue effect      |
| <b>ROS-Positive Cell Distribution</b>   | Unstained Control        | 0.5% ROS-positive / 99.5% ROS-negative                     | Background fluorescence            |
|                                         | Control                  | 3% ROS-positive / 97% ROS-negative                         | Basal ROS distribution             |
|                                         | Q                        | 18% ROS-positive / 82% ROS-negative                        | Moderate oxidative response        |
|                                         | DOX                      | 35% ROS-positive / 65% ROS-negative                        | Increased oxidative stress         |
|                                         | DOX+Q                    | 72% ROS-positive / 28% ROS-negative                        | Markedly elevated ROS accumulation |
|                                         | NAC + DOX+Q              | 10% ROS-positive / 90% ROS-negative                        | NAC-mediated ROS attenuation       |
| <b>Flow Cytometry Controls</b>          | FMO-FITC                 | MFI $\approx$ 140; 1–2% positive                           | Negative gate determination        |
|                                         | FITC Single-Stained      | MFI $\approx$ 900–1500; 95–99% positive                    | Compensation setup                 |
|                                         | Unstained Cells          | MFI $\approx$ 120; <1% positive                            | Autofluorescence reference         |
| <b>Compensation Matrix</b>              | FITC Spillover           | PE: 4%; PerCP: 0.5%; APC: 0%                               | Spectral compensation              |
|                                         | PE Spillover             | PerCP: 1%                                                  | Spectral compensation              |
|                                         | PerCP Spillover          | APC: 0.5%                                                  | Spectral compensation              |
| <b>Cytometer Acquisition Parameters</b> | ROS Dye                  | DCFH-DA                                                    | ROS detection                      |
|                                         | Excitation Laser         | 488 nm                                                     | FITC excitation                    |
|                                         | Detection Channel        | FITC (530/30 nm)                                           | Fluorescence acquisition           |
|                                         | Events Acquired          | 10,000–20,000 cells                                        | Statistical reliability            |
|                                         | FSC Threshold            | 50,000–70,000                                              | Debris exclusion                   |
|                                         | FITC PMT Voltage         | 420–500 V                                                  | Signal optimization                |
|                                         | Compensation Requirement | Minimal                                                    | Low spectral overlap               |
|                                         | Gating Strategy          | FSC/SSC $\rightarrow$ Singlets $\rightarrow$ FITC-positive | Population selection               |
|                                         | ROS Positive Threshold   | $\sim 10^3$ fluorescence units                             | Positive event definition          |
| <b>Statistical Annotation Mapping</b>   | ns                       | $p > 0.05$                                                 | Non-significant                    |
|                                         | *                        | $p < 0.05$                                                 | Significant                        |
|                                         | **                       | $p < 0.01$                                                 | Highly significant                 |
|                                         | ***                      | $p < 0.001$                                                | Very highly significant            |

| Category                                        | Parameter / Comparison | Value / Observation | Interpretation / Purpose                               |
|-------------------------------------------------|------------------------|---------------------|--------------------------------------------------------|
| <b><i>Biological Interpretation Summary</i></b> | Q vs Control           | —                   | Quercetin moderately increased intracellular ROS       |
|                                                 | DOX vs Control         | —                   | Doxorubicin significantly induced oxidative stress     |
|                                                 | DOX+Q vs DOX           | —                   | Combination treatment markedly enhanced ROS production |
|                                                 | NAC + DOX+Q vs DOX+Q   | —                   | NAC substantially attenuated ROS accumulation          |
|                                                 | NAC + DOX+Q vs Control | —                   | ROS levels partially returned toward baseline          |
